# Supplementary material
Source: publisher figshare collection journal article supplement (https://acs.figshare.com/ndownloader/files/13347239)
Supplement: Supplementary file 1 [file 13347239]

# Supporting information

## Direct Observation of Oxidation Reaction via Closed Bipolar Electrode-Anodic Electrochemiluminescence Protocol : Structural Property and Sensing Applications

Jia-Dong Zhang <sup>\*</sup>, Lei Lu, Xiu-Fang Zhu, Li-Jing Zhang, Shan Yun, Chuan-Song Duanmu, Lei He <sup>\*</sup>

*National & Local Joint Engineering Research Center for Deep Utilization Technology of Rock-salt Resource, School of Chemical Engineering, Huaiyin Institute of Technology, Huai'an, Jiangsu, 223003, China*

*\*Corresponding author: Ph.D. Jia-Dong Zhang; Ph.D. Lei He*

*E-mail address: [jiadongzhang@hyit.edu.cn](mailto:jiadongzhang@hyit.edu.cn); [heleihuaian@hyit.edu.cn](mailto:heleihuaian@hyit.edu.cn).*

*Tel/Fax: +86 517 83559061*

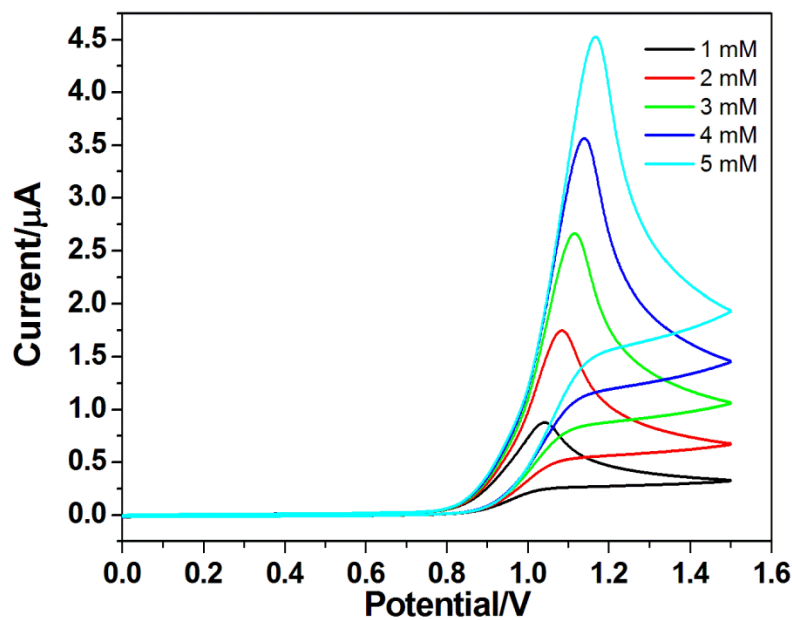

Fig S1. The corresponding electrochemical signals of the closed-BPE system in Fig 2A

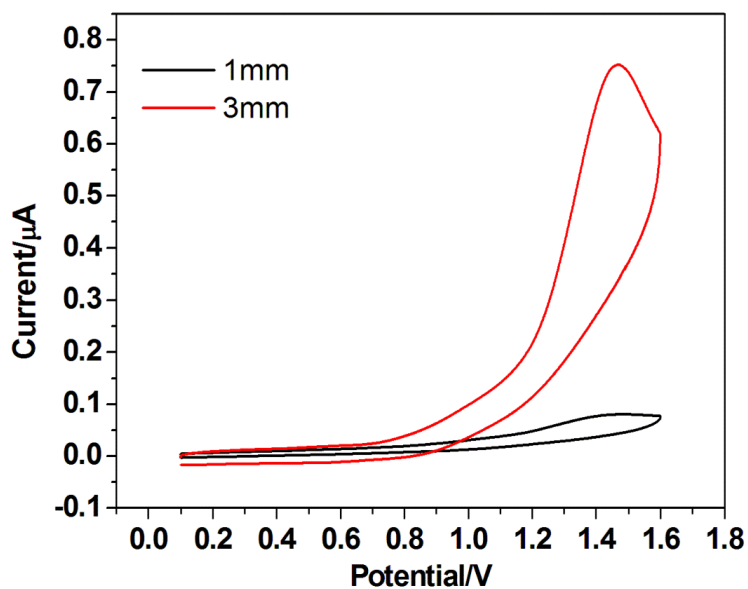

Fig S2. The electrochemical signals of the closed BPE system with different sizes of pole 2(1mm and 3 mm in diameter) for 50 mM UA in cell 2 and 2.5 mM /12.5 mM  $\text{Ru}(\text{bpy})_3^{2+}$ /TPPrA in cell 1, scan rate: 0.5V/s.

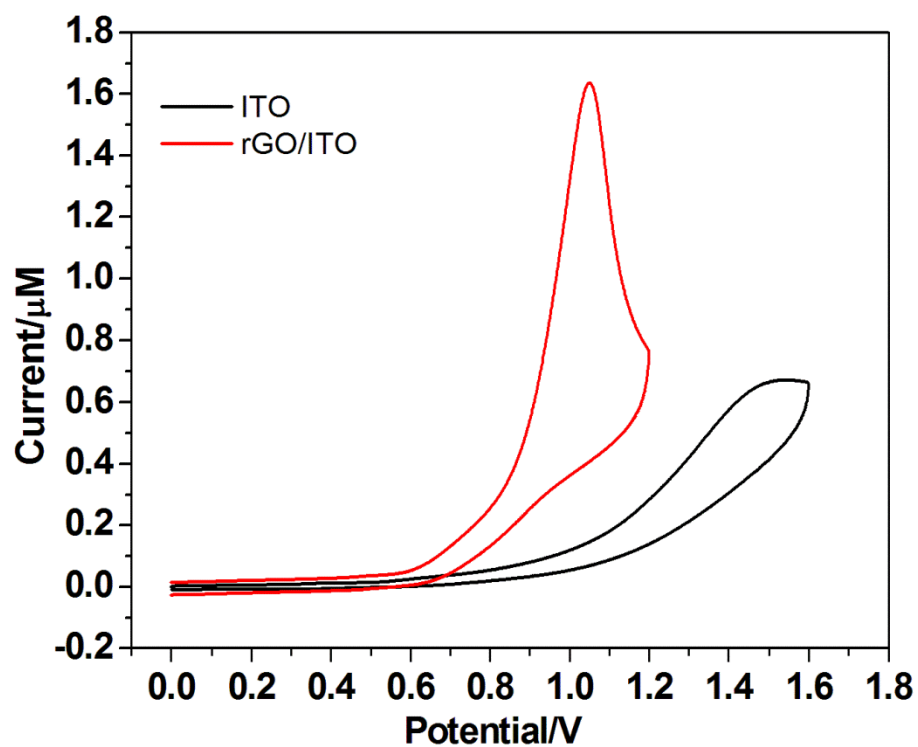

Fig S3. The electrochemical signals of the closed BPE system with different materials of pole 2 (naked ITO and ITO covered with rGO) for 50 mM DA in cell 2 and 2.5 mM /12.5mM  $\text{Ru}(\text{bpy})_3^{2+}$ /TPrA in cell 1, scan rate: 0.5V/s.
